# Supplementary material for: Analysis of cancer-associated fibroblasts related genes identifies COL11A1 associated with lung adenocarcinoma prognosis
Source: Springer Nature journal article supplement (doi:10.1186/s12920-024-01863-1), 2024-04-22

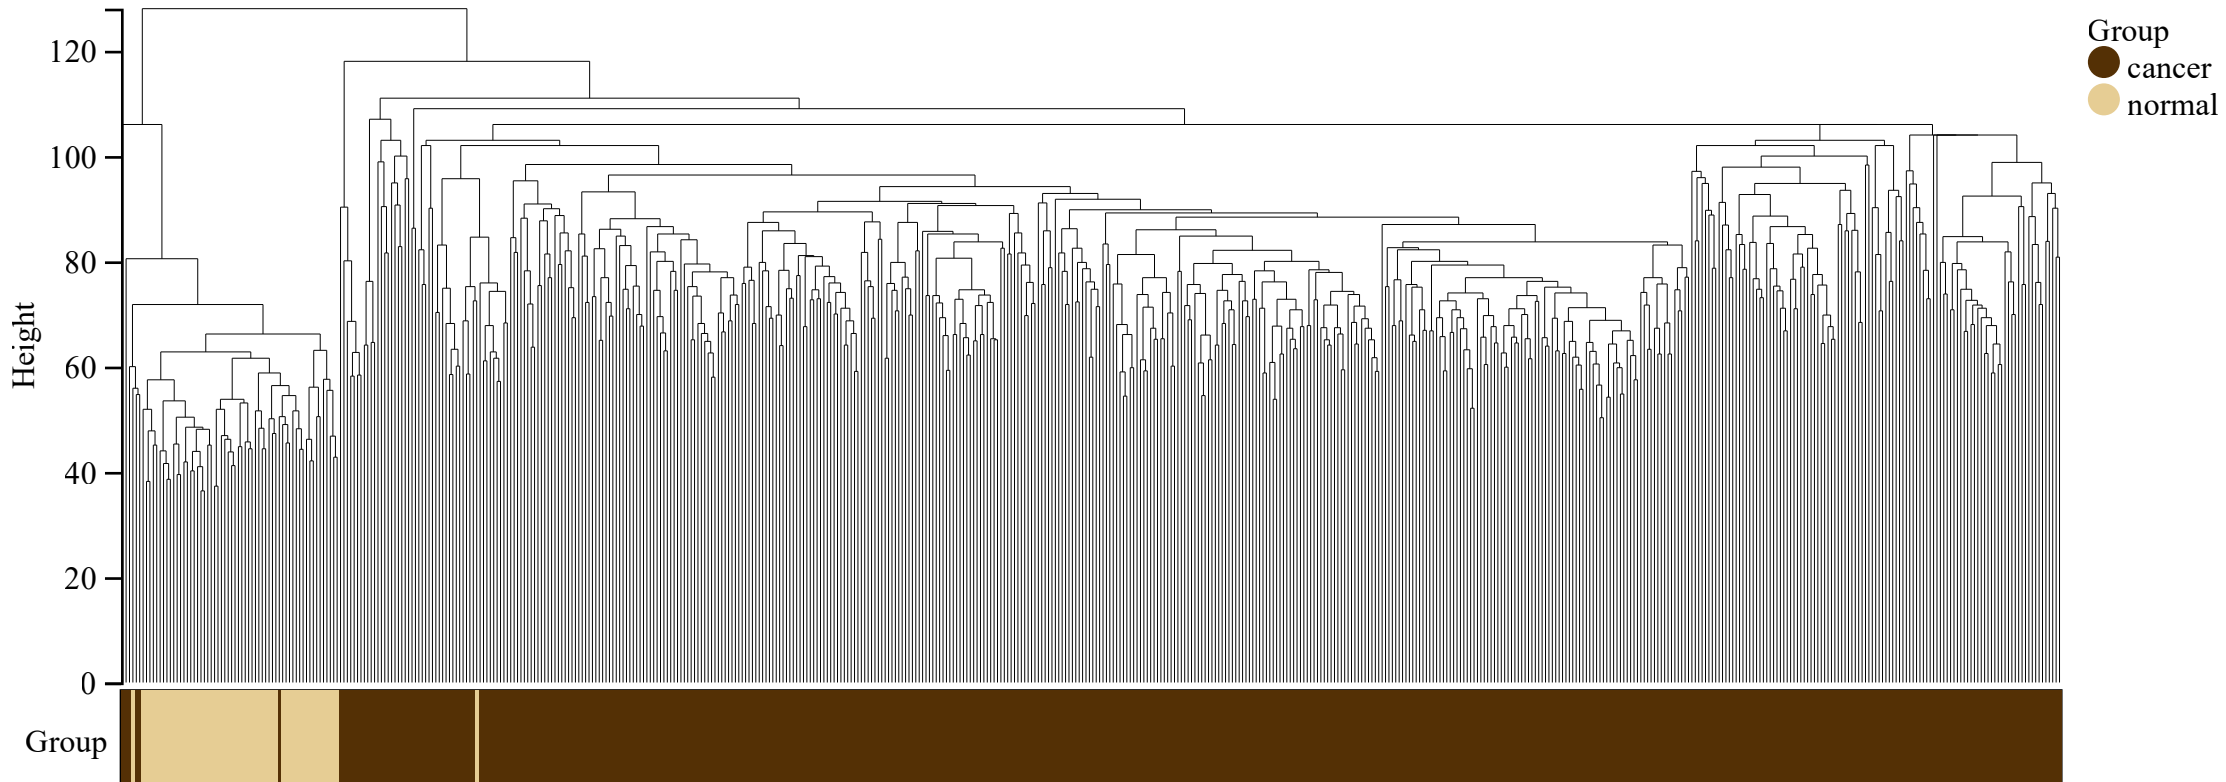

Supplement: MOESM2 [file 12920_2024_1863_MOESM2_ESM-1.pdf]
