# Supplementary material for: Analysis of cancer-associated fibroblasts related genes identifies COL11A1 associated with lung adenocarcinoma prognosis
Source: BMC Med Genomics. 2024 Apr 22;17:97. doi: 10.1186/s12920-024-01863-1 (PMC11036680; doi:10.1186/s12920-024-01863-1)
Supplement: Supplementary file 1 — Supplementary Material 1 [file 12920_2024_1863_MOESM1_ESM.xlsx]

## Sheet: sheet
Gene	dynamicModule	mergeModule
A2M	blue	black
AADAC	yellow	black
AARD	blue	black
AATK	brown	black
ABCA12	turquoise	turquoise
ABCA3	turquoise	turquoise
ABCA4	grey	grey
ABCA8	blue	black
ABCA9	blue	black
ABCB1	blue	black
ABCB6	red	black
ABCC3	grey	grey
ABCC9	brown	black
ABCG1	red	black
ABCG2	brown	black
ABHD11	brown	black
ABHD6	brown	black
ABI3BP	blue	black
ABLIM1	brown	black
ABLIM3	brown	black
AC002066.1	brown	black
AC004540.2	brown	black
AC004816.1	turquoise	turquoise
AC004836.1	pink	pink
AC004921.1	black	black
AC004947.1	yellow	black
AC005041.3	purple	purple
AC005077.4	turquoise	turquoise
AC005747.1	magenta	black
AC005884.1	blue	black
AC005993.1	grey	grey
AC006042.1	purple	purple
AC006273.1	yellow	black
AC007405.4	turquoise	turquoise
AC007490.1	grey	grey
AC007688.1	grey	grey
AC007743.1	brown	black
AC007906.2	pink	pink
AC008268.1	turquoise	turquoise
AC008496.2	grey	grey
AC008669.1	turquoise	turquoise
AC008763.3	yellow	black
AC008870.1	grey	grey
AC009005.1	blue	black
AC009065.3	grey	grey
AC009065.6	grey	grey
AC009093.3	yellow	black
AC009237.14	grey	grey
AC009806.1	blue	black
AC010719.1	purple	purple
AC010776.2	brown	black
AC010776.3	yellow	black
AC010789.1	turquoise	turquoise
AC010976.2	yellow	black
AC010998.1	yellow	black
AC010998.3	turquoise	turquoise
AC011380.1	yellow	black
AC011511.5	blue	black
AC011899.2	black	black
AC011899.3	black	black
AC012236.1	green	green
AC012513.3	brown	black
AC013457.1	black	black
AC013553.3	blue	black
AC015726.1	turquoise	turquoise
AC016773.2	purple	purple
AC016813.1	blue	black
AC018529.1	yellow	black
AC018647.1	yellow	black
AC018755.4	red	black
AC019193.2	yellow	black
AC020663.2	red	black
AC020907.1	black	black
AC021016.2	turquoise	turquoise
AC022211.4	purple	purple
AC022497.1	turquoise	turquoise
AC022509.2	red	black
AC022784.1	grey	grey
AC025575.2	grey	grey
AC025580.1	yellow	black
AC026369.3	black	black
AC026401.3	turquoise	turquoise
AC026785.3	red	black
AC026992.2	yellow	black
AC027228.2	black	black
AC027277.2	yellow	black
AC027288.1	yellow	black
AC027288.2	yellow	black
AC027288.3	yellow	black
AC027601.1	grey	grey
AC034105.1	green	green
AC046195.1	yellow	black
AC048341.2	purple	purple
AC067817.2	blue	black
AC068587.2	pink	pink
AC068870.2	brown	black
AC069360.1	black	black
AC073149.1	turquoise	turquoise
AC073585.1	turquoise	turquoise
AC079210.1	turquoise	turquoise
AC079325.6	brown	black
AC079467.1	turquoise	turquoise
AC080037.2	turquoise	turquoise
AC080112.1	turquoise	turquoise
AC083809.1	grey	grey
AC084880.1	brown	black
AC087521.1	brown	black
AC087741.1	purple	purple
AC089999.1	pink	pink
AC090181.2	yellow	black
AC090559.1	red	black
AC090772.5	black	black
AC090796.1	yellow	black
AC091588.3	blue	black
AC091817.1	grey	grey
AC092071.1	turquoise	turquoise
AC092691.1	blue	black
AC092868.2	grey	grey
AC093110.1	yellow	black
AC093278.2	brown	black
AC093787.1	yellow	black
AC093890.1	yellow	black
AC095050.1	yellow	black
AC096531.2	yellow	black
AC096921.2	brown	black
AC098934.1	red	black
AC099509.1	grey	grey
AC099539.1	blue	black
AC099850.4	turquoise	turquoise
AC100793.4	yellow	black
AC103563.1	green	green
AC103563.3	green	green
AC104083.1	blue	black
AC104237.2	yellow	black
AC104237.3	yellow	black
AC104966.1	grey	grey
AC104984.1	yellow	black
AC104984.2	yellow	black
AC104984.5	yellow	black
AC105009.1	purple	purple
AC105219.4	blue	black
AC105914.2	yellow	black
AC105942.1	blue	black
AC106900.1	grey	grey
AC107959.3	grey	grey
AC108134.3	red	black
AC109583.3	blue	black
AC110611.1	brown	black
AC111149.2	grey	grey
AC112206.2	yellow	black
AC112722.1	turquoise	turquoise
AC113349.1	pink	pink
AC116312.1	yellow	black
AC116407.1	turquoise	turquoise
AC119424.1	yellow	black
AC120498.4	grey	grey
AC125807.2	brown	black
AC128709.3	yellow	black
AC130371.2	brown	black
AC131649.2	yellow	black
AC134879.2	green	green
AC135012.3	yellow	black
AC135068.2	green	green
AC136428.1	green	green
AC136475.3	purple	purple
AC140479.2	purple	purple
AC142381.1	green	green
AC144831.1	brown	black
AC145207.9	purple	purple
AC147067.2	brown	black
AC236972.3	turquoise	turquoise
AC244153.1	brown	black
AC244250.2	green	green
AC245041.1	brown	black
AC245041.2	brown	black
AC245297.1	red	black
AC246787.3	green	green
AC246787.4	green	green
ACACB	blue	black
ACADL	yellow	black
ACE	brown	black
ACHE	grey	grey
ACKR1	brown	black
ACKR4	yellow	black
ACOXL	turquoise	turquoise
ACP5	black	black
ACP6	purple	purple
ACSL4	red	black
ACSS3	brown	black
ACTG2	magenta	black
ACTN2	yellow	black
ACVRL1	brown	black
ACY3	grey	grey
ADA2	red	black
ADAM12	greenyellow	greenyellow
ADAM28	grey	grey
ADAM8	greenyellow	greenyellow
ADAMDEC1	green	green
ADAMTS1	brown	black
ADAMTS12	greenyellow	greenyellow
ADAMTS14	greenyellow	greenyellow
ADAMTS15	brown	black
ADAMTS16	greenyellow	greenyellow
ADAMTS7P3	yellow	black
ADAMTS8	blue	black
ADAMTS9-AS1	blue	black
ADAMTSL3	brown	black
ADAMTSL4	black	black
ADARB1	magenta	black
ADCK5	purple	purple
ADCY4	brown	black
ADCY8	yellow	black
ADCY9	blue	black
ADGRD1	turquoise	turquoise
ADGRE1	black	black
ADGRE3	brown	black
ADGRE5	black	black
ADGRF1	grey	grey
ADGRF4	turquoise	turquoise
ADGRF5	turquoise	turquoise
ADGRG1	grey	grey
ADGRL2	brown	black
ADGRL4	brown	black
ADH1B	blue	black
ADIRF-AS1	yellow	black
ADM2	yellow	black
ADPRH	brown	black
ADRA1A	yellow	black
ADRA1D	brown	black
ADRB1	yellow	black
ADRB2	blue	black
ADSS1	red	black
ADTRP	black	black
AF064861.1	purple	purple
AF131215.5	blue	black
AF131215.6	blue	black
AF131215.7	blue	black
AFAP1-AS1	yellow	black
AFAP1L1	brown	black
AFF3	blue	black
AGER	yellow	black
AGMAT	turquoise	turquoise
AGPAT4	brown	black
AGR2	grey	grey
AGR3	turquoise	turquoise
AGRP	black	black
AGT	grey	grey
AGTPBP1	brown	black
AGTR1	blue	black
AGTR2	yellow	black
AHNAK	brown	black
AHNAK2	greenyellow	greenyellow
AIF1	black	black
AIM2	green	green
AK1	turquoise	turquoise
AK4	turquoise	turquoise
AK7	pink	pink
AKAP12	brown	black
AKAP13	blue	black
AKAP14	pink	pink
AKAP2	brown	black
AKAP7	blue	black
AKR1B10	grey	grey
AKR1B15	grey	grey
AKR7A3	red	black
AKT3	magenta	black
AL031058.1	turquoise	turquoise
AL031985.3	turquoise	turquoise
AL033397.2	turquoise	turquoise
AL033519.4	yellow	black
AL034397.3	red	black
AL035409.1	brown	black
AL035446.1	black	black
AL049555.1	grey	grey
AL096828.3	blue	black
AL109615.3	turquoise	turquoise
AL109741.1	brown	black
AL121790.2	pink	pink
AL121949.1	black	black
AL121949.2	black	black
AL121949.3	black	black
AL122127.2	green	green
AL132712.1	red	black
AL133355.1	blue	black
AL136369.1	yellow	black
AL136452.1	turquoise	turquoise
AL161618.1	pink	pink
AL161785.1	red	black
AL162511.1	turquoise	turquoise
AL162595.1	yellow	black
AL353693.1	grey	grey
AL354707.1	blue	black
AL354714.1	yellow	black
AL354714.3	yellow	black
AL355312.4	grey	grey
AL355353.2	brown	black
AL355379.1	grey	grey
AL355796.1	grey	grey
AL357054.4	blue	black
AL357093.2	pink	pink
AL365181.3	grey	grey
AL390719.1	brown	black
AL390719.2	purple	purple
AL390755.1	brown	black
AL391056.1	grey	grey
AL391244.2	purple	purple
AL391427.1	grey	grey
AL445307.1	yellow	black
AL445423.1	blue	black
AL445493.3	turquoise	turquoise
AL445524.1	turquoise	turquoise
AL450992.1	black	black
AL589765.4	yellow	black
AL590113.1	brown	black
AL590226.1	yellow	black
AL590666.2	grey	grey
AL603750.1	turquoise	turquoise
AL606469.1	yellow	black
AL662899.2	purple	purple
AL663070.2	turquoise	turquoise
AL691482.4	purple	purple
AL844908.1	grey	grey
ALAS2	brown	black
ALDH18A1	yellow	black
ALDH1A1	pink	pink
ALDH1A2	grey	grey
ALDH2	turquoise	turquoise
ALDH3B1	turquoise	turquoise
ALDH3B2	blue	black
ALDOA	turquoise	turquoise
ALG1L	brown	black
ALG3	turquoise	turquoise
ALKAL2	blue	black
ALOX15	pink	pink
ALOX15B	turquoise	turquoise
ALOX5	black	black
ALOX5AP	black	black
ALPL	turquoise	turquoise
ALPP	brown	black
AMIGO1	turquoise	turquoise
AMOTL1	brown	black
ANGPT1	blue	black
ANGPT4	yellow	black
ANGPTL1	blue	black
ANGPTL4	grey	grey
ANGPTL7	yellow	black
ANKRD1	yellow	black
ANKRD22	brown	black
ANKRD29	blue	black
ANKRD33B	red	black
ANKRD44-AS1	pink	pink
ANKRD66	pink	pink
ANKS1A	brown	black
ANLN	turquoise	turquoise
ANO9	purple	purple
ANOS1	blue	black
ANPEP	black	black
ANXA1	black	black
ANXA3	brown	black
ANXA8	brown	black
ANXA8L1	brown	black
AOC1	grey	grey
AOC3	blue	black
AOX1	blue	black
AP000438.1	yellow	black
AP000553.2	purple	purple
AP000769.1	turquoise	turquoise
AP000866.2	turquoise	turquoise
AP001107.9	blue	black
AP001189.1	brown	black
AP001189.3	brown	black
AP001528.1	brown	black
AP001528.2	brown	black
AP001972.5	turquoise	turquoise
AP002498.1	grey	grey
AP002856.2	yellow	black
AP002954.1	black	black
AP003108.5	black	black
AP003385.4	yellow	black
AP003469.2	turquoise	turquoise
AP005233.2	grey	grey
AP1S1	blue	black
APBA2	greenyellow	greenyellow
APBB1	blue	black
APBB2	magenta	black
APLN	brown	black
APLNR	brown	black
APOA1	yellow	black
APOBEC3B	turquoise	turquoise
APOBEC4	pink	pink
APOBR	black	black
APOC1	black	black
APOH	grey	grey
APOL3	red	black
APOL4	black	black
APOLD1	brown	black
AQP1	blue	black
AQP4	turquoise	turquoise
AQP9	black	black
ARAP2	blue	black
ARAP3	brown	black
ARC	brown	black
ARHGAP11A	turquoise	turquoise
ARHGAP18	red	black
ARHGAP23	brown	black
ARHGAP24	blue	black
ARHGAP25	red	black
ARHGAP29	brown	black
ARHGAP30	red	black
ARHGAP31	magenta	black
ARHGAP39	turquoise	turquoise
ARHGAP40	purple	purple
ARHGAP44	turquoise	turquoise
ARHGAP6	brown	black
ARHGEF10	brown	black
ARHGEF15	brown	black
ARHGEF16	red	black
ARHGEF19	purple	purple
ARHGEF2-AS1	turquoise	turquoise
ARHGEF26	yellow	black
ARHGEF37	blue	black
ARHGEF39	turquoise	turquoise
ARHGEF6	red	black
ARMC4	pink	pink
ARMCX1	blue	black
ARMH2	pink	pink
ARNTL2	turquoise	turquoise
ARRB1	turquoise	turquoise
ARRDC4	red	black
ART4	blue	black
ASF1B	turquoise	turquoise
ASGR1	black	black
ASNS	turquoise	turquoise
ASPA	yellow	black
ASPHD1	grey	grey
ASPM	turquoise	turquoise
ATAD2	turquoise	turquoise
ATAD3A	turquoise	turquoise
ATAD3B	purple	purple
ATAT1	purple	purple
ATF3	brown	black
ATIC	turquoise	turquoise
ATOH8	turquoise	turquoise
ATP10A	red	black
ATP10B	grey	grey
ATP13A4	turquoise	turquoise
ATP13A4-AS1	blue	black
ATP1A2	blue	black
ATP1B2	blue	black
ATP5PBP5	pink	pink
ATP6V1C2	black	black
ATP8A1	turquoise	turquoise
AUNIP	turquoise	turquoise
AURKA	turquoise	turquoise
AURKB	turquoise	turquoise
AVPR2	brown	black
AXIN2	blue	black
AXL	red	black
B3GALNT1	black	black
B3GNT3	yellow	black
B3GNT6	grey	grey
B4GALNT4	turquoise	turquoise
B4GALT2	turquoise	turquoise
BAALC	grey	grey
BAIAP2L1	blue	black
BAIAP2L2	grey	grey
BANCR	yellow	black
BARX1	black	black
BARX2	grey	grey
BASP1	turquoise	turquoise
BBOX1-AS1	grey	grey
BCHE	blue	black
BCL2A1	black	black
BCL2L15	grey	grey
BCL6B	brown	black
BCL9	turquoise	turquoise
BDH1	red	black
BDNF	yellow	black
BEAN1	greenyellow	greenyellow
BEX1	grey	grey
BEX4	blue	black
BEX5	grey	grey
BHLHA15	green	green
BHLHE41	red	black
BHMT2	grey	grey
BICDL1	blue	black
BIK	blue	black
BIRC5	turquoise	turquoise
BLACAT1	grey	grey
BLM	turquoise	turquoise
BMP2	brown	black
BMP5	blue	black
BMP6	brown	black
BMP8A	greenyellow	greenyellow
BMPER	brown	black
BMPR2	brown	black
BMX	blue	black
BNIP3P11	turquoise	turquoise
BOP1	turquoise	turquoise
BPHL	brown	black
BPIFA1	grey	grey
BPIFA2	grey	grey
BPIFB2	grey	grey
BRDT	grey	grey
BRIP1	turquoise	turquoise
BRIX1	turquoise	turquoise
BST1	black	black
BTG2	turquoise	turquoise
BTK	red	black
BTNL9	yellow	black
BUB1	turquoise	turquoise
BUB1B	turquoise	turquoise
BYSL	turquoise	turquoise
BZW2	turquoise	turquoise
C10orf67	yellow	black
C11orf80	brown	black
C11orf86	grey	grey
C11orf88	pink	pink
C11orf96	brown	black
C11orf97	pink	pink
C12orf49	brown	black
C14orf132	blue	black
C15orf48	turquoise	turquoise
C16orf54	red	black
C16orf89	turquoise	turquoise
C19orf38	black	black
C19orf48	turquoise	turquoise
C1orf112	turquoise	turquoise
C1orf115	brown	black
C1orf116	turquoise	turquoise
C1orf158	pink	pink
C1orf162	black	black
C1orf189	pink	pink
C1orf194	pink	pink
C1orf198	blue	black
C1orf21	turquoise	turquoise
C1orf87	pink	pink
C1QA	black	black
C1QB	black	black
C1QC	black	black
C1QTNF2	blue	black
C1QTNF6	greenyellow	greenyellow
C1QTNF7	blue	black
C2	brown	black
C20orf194	blue	black
C20orf202	yellow	black
C20orf85	pink	pink
C22orf15	pink	pink
C2CD4A	blue	black
C2CD4D	black	black
C2CD4D-AS1	grey	grey
C2orf91	yellow	black
C3orf86	turquoise	turquoise
C4BPA	turquoise	turquoise
C4orf48	blue	black
C5AR1	black	black
C5orf34	turquoise	turquoise
C5orf38	turquoise	turquoise
C5orf49	pink	pink
C6	pink	pink
C6orf118	pink	pink
C7	blue	black
C8B	yellow	black
C8orf34-AS1	turquoise	turquoise
C9orf24	pink	pink
CA2	brown	black
CA3	blue	black
CA4	yellow	black
CA9	grey	grey
CAB39L	blue	black
CABCOCO1	pink	pink
CABLES1	blue	black
CABLES2	turquoise	turquoise
CABYR	black	black
CACHD1	blue	black
CACNA2D2	turquoise	turquoise
CACNB4	turquoise	turquoise
CACNG4	grey	grey
CACNG6	pink	pink
CADM1	blue	black
CALCA	grey	grey
CALCOCO1	blue	black
CALCRL	brown	black
CAMK2N1	brown	black
CAMP	yellow	black
CAPN12	purple	purple
CAPN5	grey	grey
CAPN9	turquoise	turquoise
CAPSL	pink	pink
CARD11	grey	grey
CARD14	turquoise	turquoise
CARD16	black	black
CASC9	turquoise	turquoise
CASKIN2	brown	black
CASP1	red	black
CASP12	yellow	black
CASP17P	red	black
CASQ2	blue	black
CASS4	blue	black
CAT	blue	black
CATSPERD	pink	pink
CAV1	brown	black
CAV2	brown	black
CAVIN1	magenta	black
CAVIN2	blue	black
CBFA2T3	blue	black
CBLC	blue	black
CBX2	turquoise	turquoise
CBX3	turquoise	turquoise
CBX4	turquoise	turquoise
CBX7	blue	black
CBX8	turquoise	turquoise
CCBE1	brown	black
CCDC141	yellow	black
CCDC152	blue	black
CCDC167	turquoise	turquoise
CCDC17	pink	pink
CCDC170	pink	pink
CCDC173	pink	pink
CCDC34	turquoise	turquoise
CCDC50	brown	black
CCDC68	blue	black
CCDC69	blue	black
CCDC85A	brown	black
CCHCR1	turquoise	turquoise
CCL14	blue	black
CCL18	black	black
CCL19	green	green
CCL2	black	black
CCL20	grey	grey
CCL21	brown	black
CCL23	black	black
CCL24	black	black
CCM2L	brown	black
CCN1	blue	black
CCN2	magenta	black
CCN4	greenyellow	greenyellow
CCN5	blue	black
CCNA2	turquoise	turquoise
CCNB1	turquoise	turquoise
CCNB2	turquoise	turquoise
CCND2	red	black
CCNE1	turquoise	turquoise
CCNE2	turquoise	turquoise
CCNF	turquoise	turquoise
CCNO	grey	grey
CCRL2	black	black
CCT3	turquoise	turquoise
CCT5	turquoise	turquoise
CD101	red	black
CD163	black	black
CD19	green	green
CD24	grey	grey
CD244	red	black
CD27	green	green
CD274	red	black
CD300C	black	black
CD300E	black	black
CD300LF	black	black
CD300LG	yellow	black
CD302	blue	black
CD33	black	black
CD34	brown	black
CD36	brown	black
CD37	red	black
CD4	red	black
CD44	red	black
CD52	black	black
CD53	red	black
CD5L	yellow	black
CD68	black	black
CD69	red	black
CD74	red	black
CD79A	green	green
CD83	red	black
CD93	brown	black
CDA	grey	grey
CDC20	turquoise	turquoise
CDC25A	turquoise	turquoise
CDC25C	turquoise	turquoise
CDC45	turquoise	turquoise
CDC6	turquoise	turquoise
CDCA2	turquoise	turquoise
CDCA3	turquoise	turquoise
CDCA4	turquoise	turquoise
CDCA5	turquoise	turquoise
CDCA7	turquoise	turquoise
CDCA8	turquoise	turquoise
CDH13	magenta	black
CDH17	grey	grey
CDH24	turquoise	turquoise
CDH3	greenyellow	greenyellow
CDH5	brown	black
CDHR3	pink	pink
CDHR4	pink	pink
CDK1	turquoise	turquoise
CDK14	magenta	black
CDKN1C	brown	black
CDKN2A	turquoise	turquoise
CDKN2B	brown	black
CDKN3	turquoise	turquoise
CDO1	blue	black
CDT1	turquoise	turquoise
CEACAM1	grey	grey
CEACAM21	red	black
CEACAM5	grey	grey
CEACAM7	grey	grey
CEBPA	turquoise	turquoise
CELF2	blue	black
CELSR3	turquoise	turquoise
CEMIP	greenyellow	greenyellow
CENPA	turquoise	turquoise
CENPE	turquoise	turquoise
CENPF	turquoise	turquoise
CENPH	turquoise	turquoise
CENPI	turquoise	turquoise
CENPK	turquoise	turquoise
CENPL	turquoise	turquoise
CENPM	turquoise	turquoise
CENPU	turquoise	turquoise
CENPW	turquoise	turquoise
CEP55	turquoise	turquoise
CERCAM	greenyellow	greenyellow
CES1	blue	black
CFAP161	pink	pink
CFAP43	pink	pink
CFAP52	pink	pink
CFAP53	pink	pink
CFAP58	pink	pink
CFAP65	pink	pink
CFAP73	pink	pink
CFAP77	pink	pink
CFB	grey	grey
CFD	blue	black
CFL2	yellow	black
CFP	red	black
CFTR	turquoise	turquoise
CGNL1	turquoise	turquoise
CGREF1	blue	black
CHAF1B	turquoise	turquoise
CHEK1	turquoise	turquoise
CHEK2	turquoise	turquoise
CHI3L2	blue	black
CHIA	turquoise	turquoise
CHIAP2	yellow	black
CHPF	yellow	black
CHRDL1	blue	black
CHRM1	yellow	black
CHRNA5	black	black
CHST9	pink	pink
CHTF18	purple	purple
CILP	greenyellow	greenyellow
CILP2	greenyellow	greenyellow
CIP2A	turquoise	turquoise
CIT	grey	grey
CITED2	turquoise	turquoise
CKAP2L	turquoise	turquoise
CKMT1A	grey	grey
CKMT1B	red	black
CKS1B	turquoise	turquoise
CLCN2	turquoise	turquoise
CLDN10	grey	grey
CLDN10-AS1	grey	grey
CLDN11	brown	black
CLDN12	brown	black
CLDN18	yellow	black
CLDN3	grey	grey
CLDN4	grey	grey
CLDN5	brown	black
CLDN6	grey	grey
CLDN9	grey	grey
CLEC12A	black	black
CLEC14A	brown	black
CLEC1A	brown	black
CLEC3B	brown	black
CLEC4E	red	black
CLEC4M	yellow	black
CLIC2	red	black
CLIC3	turquoise	turquoise
CLIC5	yellow	black
CLPSL2	grey	grey
CLSPN	turquoise	turquoise
CLU	blue	black
CMKLR1	red	black
CMTM2	brown	black
CNFN	brown	black
CNGA3	grey	grey
CNGA4	pink	pink
CNKSR2	blue	black
CNN1	magenta	black
CNOT11	turquoise	turquoise
CNR1	blue	black
CNRIP1	magenta	black
CNTD2	blue	black
CNTFR	blue	black
CNTN1	grey	grey
CNTN6	yellow	black
COA6	turquoise	turquoise
COBL	brown	black
COCH	turquoise	turquoise
COL10A1	greenyellow	greenyellow
COL11A1	greenyellow	greenyellow
COL13A1	blue	black
COL17A1	grey	grey
COL1A1	greenyellow	greenyellow
COL1A2	greenyellow	greenyellow
COL3A1	greenyellow	greenyellow
COL4A3	turquoise	turquoise
COL4A4	turquoise	turquoise
COL4A5	blue	black
COL5A1	greenyellow	greenyellow
COL5A2	greenyellow	greenyellow
COL6A5	blue	black
COL6A6	blue	black
COL7A1	greenyellow	greenyellow
COL9A2	purple	purple
COLCA1	pink	pink
COLEC10	yellow	black
COLEC12	red	black
COLGALT2	blue	black
COMP	greenyellow	greenyellow
CORO2B	blue	black
COX4I2	brown	black
COX7A1	magenta	black
CP	yellow	black
CPA3	blue	black
CPAMD8	turquoise	turquoise
CPB2	blue	black
CPD	turquoise	turquoise
CPED1	blue	black
CPM	blue	black
CPNE7	grey	grey
CPS1	grey	grey
CPVL	red	black
CPXM1	greenyellow	greenyellow
CR2	green	green
CRABP1	turquoise	turquoise
CRABP2	yellow	black
CREB3L4	red	black
CRIM1	blue	black
CRIM1-DT	grey	grey
CRLF1	grey	grey
CRTAC1	blue	black
CRY2	turquoise	turquoise
CRYAB	brown	black
CSAG1	turquoise	turquoise
CSF2RB	red	black
CSF3	brown	black
CSF3R	brown	black
CSRNP1	brown	black
CST1	yellow	black
CST2	greenyellow	greenyellow
CST4	grey	grey
CST5	turquoise	turquoise
CST6	black	black
CSTA	black	black
CSTF2	turquoise	turquoise
CT83	grey	grey
CTA-384D8.31	turquoise	turquoise
CTD-2134A5.3	grey	grey
CTDSPL	blue	black
CTHRC1	greenyellow	greenyellow
CTIF	brown	black
CTNNAL1	brown	black
CTSG	blue	black
CTSH	turquoise	turquoise
CTSS	red	black
CTSV	turquoise	turquoise
CTSW	red	black
CTXND1	yellow	black
CWH43	pink	pink
CX3CL1	red	black
CX3CR1	blue	black
CXCL12	magenta	black
CXCL13	green	green
CXCL14	grey	grey
CXCL16	blue	black
CXCL2	brown	black
CXCL3	brown	black
CXCL5	grey	grey
CXCR1	brown	black
CXCR2	brown	black
CYB5A	turquoise	turquoise
CYBB	red	black
CYBRD1	blue	black
CYGB	brown	black
CYP1A2	yellow	black
CYP24A1	turquoise	turquoise
CYP27A1	black	black
CYP27B1	yellow	black
CYP27C1	grey	grey
CYP2B7P	turquoise	turquoise
CYP2F1	pink	pink
CYP4B1	turquoise	turquoise
CYP4Z2P	turquoise	turquoise
CYS1	blue	black
CYTOR	turquoise	turquoise
CYYR1	brown	black
DAAM2	blue	black
DAB2	red	black
DAB2IP	brown	black
DACH1	brown	black
DAPK1	blue	black
DAPK2	turquoise	turquoise
DARS2	turquoise	turquoise
DAW1	pink	pink
DBF4	turquoise	turquoise
DBN1	turquoise	turquoise
DBNDD1	turquoise	turquoise
DCAF13	turquoise	turquoise
DCC	brown	black
DCDC2	pink	pink
DCDC2B	pink	pink
DCN	magenta	black
DCST1-AS1	brown	black
DCSTAMP	black	black
DDIT4L	grey	grey
DDO	black	black
DDR2	magenta	black
DDX11	turquoise	turquoise
DDX12P	turquoise	turquoise
DECR2	brown	black
DENND2A	brown	black
DENND3	brown	black
DEPDC1	turquoise	turquoise
DEPDC1B	turquoise	turquoise
DEPP1	brown	black
DEPTOR	grey	grey
DERL3	green	green
DES	blue	black
DGCR5	yellow	black
DGCR9	grey	grey
DHCR24	blue	black
DIO2	greenyellow	greenyellow
DIPK2A	blue	black
DIPK2B	brown	black
DIRAS1	grey	grey
DISP1	blue	black
DIXDC1	magenta	black
DKC1	turquoise	turquoise
DKK2	brown	black
DKK3	magenta	black
DLC1	blue	black
DLGAP5	turquoise	turquoise
DLL3	turquoise	turquoise
DLX3	grey	grey
DMBT1	turquoise	turquoise
DNA2	turquoise	turquoise
DNAAF1	pink	pink
DNAH9	pink	pink
DNAI1	pink	pink
DNAI2	pink	pink
DNAJB4	brown	black
DNAJC12	yellow	black
DNAJC22	turquoise	turquoise
DNASE1L3	brown	black
DNASE2B	black	black
DNMT3B	turquoise	turquoise
DNTTIP1	blue	black
DOCK11	red	black
DOCK2	red	black
DOCK4	blue	black
DOCK8	red	black
DOK2	black	black
DOK5	greenyellow	greenyellow
DOK7	yellow	black
DONSON	turquoise	turquoise
DPEP2	black	black
DPP10-AS1	grey	grey
DPT	magenta	black
DPYSL2	blue	black
DRAIC	grey	grey
DRAM1	turquoise	turquoise
DRC1	pink	pink
DRC3	pink	pink
DSCAM-AS1	black	black
DSCC1	turquoise	turquoise
DSG2	turquoise	turquoise
DSP	turquoise	turquoise
DST	blue	black
DTHD1	pink	pink
DTL	turquoise	turquoise
DTNB-AS1	green	green
DTX2	grey	grey
DTYMK	turquoise	turquoise
DUBR	pink	pink
DUOX1	turquoise	turquoise
DUOXA1	turquoise	turquoise
DUS1L	turquoise	turquoise
DUSP1	brown	black
DUSP13	turquoise	turquoise
DUSP4	black	black
DUSP8	brown	black
DUSP9	turquoise	turquoise
DYDC2	pink	pink
DYNLRB2	pink	pink
E2F1	turquoise	turquoise
E2F2	turquoise	turquoise
E2F3	turquoise	turquoise
E2F7	turquoise	turquoise
E2F8	turquoise	turquoise
ECE2	turquoise	turquoise
ECEL1	grey	grey
ECEL1P2	yellow	black
ECM2	magenta	black
ECRG4	pink	pink
ECSCR	brown	black
ECT2	turquoise	turquoise
ECT2L	pink	pink
EDIL3	magenta	black
EDN1	brown	black
EDN2	grey	grey
EDN3	blue	black
EDNRA	magenta	black
EDNRB	brown	black
EEF1A1P5	blue	black
EEF1A1P6	blue	black
EEF1A2	grey	grey
EFCAB1	pink	pink
EFCC1	blue	black
EFEMP1	blue	black
EFHB	pink	pink
EFNA3	turquoise	turquoise
EFNA4	turquoise	turquoise
EFNB1	brown	black
EFNB2	brown	black
EFR3B	brown	black
EGF	grey	grey
EGFL7	brown	black
EGLN3	turquoise	turquoise
EGR1	blue	black
EGR2	red	black
EGR3	blue	black
EHD2	magenta	black
EIF4E3	blue	black
EIF4EBP1	turquoise	turquoise
ELF3-AS1	blue	black
ELF5	grey	grey
ELMO1	brown	black
ELN	blue	black
EMC3-AS1	turquoise	turquoise
EMCN	brown	black
EME1	turquoise	turquoise
EMILIN2	black	black
EML1	blue	black
EMP1	brown	black
EMP2	blue	black
EMP3	black	black
EMSLR	turquoise	turquoise
ENC1	grey	grey
ENG	brown	black
ENHO	yellow	black
ENKUR	pink	pink
ENO1	turquoise	turquoise
ENO3	black	black
ENPP2	brown	black
ENTPD2	grey	grey
ENTPD8	red	black
EP300-AS1	blue	black
EPAS1	brown	black
EPB41L2	magenta	black
EPB41L3	red	black
EPB41L5	yellow	black
EPCAM	brown	black
EPHA10	yellow	black
EPHB2	turquoise	turquoise
EPHB6	red	black
EPHX3	grey	grey
EPHX4	turquoise	turquoise
EPN3	blue	black
EPOP	turquoise	turquoise
ERBB4	blue	black
ERCC6L	turquoise	turquoise
ERFE	grey	grey
ERG	brown	black
ERICH2	turquoise	turquoise
ERICH3	pink	pink
ERO1A	turquoise	turquoise
ESAM	brown	black
ESCO2	turquoise	turquoise
ESPL1	turquoise	turquoise
ESPN	grey	grey
ESRP1	black	black
ESYT3	turquoise	turquoise
ETS1	red	black
ETS2	brown	black
ETV1	blue	black
ETV4	yellow	black
ETV5	blue	black
EVI2B	red	black
EXO1	turquoise	turquoise
EXOC3L1	brown	black
EXOSC5	turquoise	turquoise
EYA4	brown	black
EZH2	turquoise	turquoise
F10	blue	black
F11	blue	black
F12	turquoise	turquoise
F2RL3	brown	black
F8	blue	black
FA2H	grey	grey
FABP4	yellow	black
FABP5	yellow	black
FABP5P7	yellow	black
FAM107A	brown	black
FAM110D	brown	black
FAM111B	turquoise	turquoise
FAM124B	brown	black
FAM136A	turquoise	turquoise
FAM13C	blue	black
FAM155B	grey	grey
FAM162B	brown	black
FAM166B	pink	pink
FAM167A	brown	black
FAM167B	brown	black
FAM177B	grey	grey
FAM178B	grey	grey
FAM181A	pink	pink
FAM183A	pink	pink
FAM184A	turquoise	turquoise
FAM189A1	brown	black
FAM189A2	blue	black
FAM216B	pink	pink
FAM241A	brown	black
FAM43A	brown	black
FAM49A	red	black
FAM81B	pink	pink
FAM83A	turquoise	turquoise
FAM83A-AS1	turquoise	turquoise
FAM83D	turquoise	turquoise
FAM83H	red	black
FAM92B	pink	pink
FANCA	turquoise	turquoise
FANCD2	turquoise	turquoise
FANCG	turquoise	turquoise
FANCI	turquoise	turquoise
FAP	greenyellow	greenyellow
FAR2	red	black
FAT4	magenta	black
FAXDC2	blue	black
FBLN1	magenta	black
FBLN5	blue	black
FBN3	grey	grey
FBP1	black	black
FBXL19	turquoise	turquoise
FBXL7	magenta	black
FBXO32	greenyellow	greenyellow
FBXO41	turquoise	turquoise
FCER1A	blue	black
FCER1G	black	black
FCGR1A	black	black
FCGR3A	black	black
FCGR3B	brown	black
FCN1	black	black
FCN3	yellow	black
FCRL5	green	green
FDCSP	green	green
FEN1	turquoise	turquoise
FENDRR	yellow	black
FER1L4	turquoise	turquoise
FERMT1	yellow	black
FERMT2	magenta	black
FERMT3	black	black
FEZ1	magenta	black
FEZF1	grey	grey
FEZF1-AS1	grey	grey
FFAR4	black	black
FGB	grey	grey
FGD3	red	black
FGD5	brown	black
FGF10	blue	black
FGF14-AS2	blue	black
FGF18	blue	black
FGF2	blue	black
FGF7	magenta	black
FGFBP2	yellow	black
FGFR2	blue	black
FGFR4	yellow	black
FGL1	black	black
FGR	black	black
FHDC1	blue	black
FHL1	blue	black
FHL2	greenyellow	greenyellow
FHL5	brown	black
FIBIN	magenta	black
FIGNL1	turquoise	turquoise
FILIP1	blue	black
FKBP10	turquoise	turquoise
FKBP11	green	green
FKBP1B	grey	grey
FLAD1	turquoise	turquoise
FLI1	red	black
FLRT3	blue	black
FLT4	brown	black
FLVCR2	black	black
FMO2	blue	black
FMO3	magenta	black
FNDC1	greenyellow	greenyellow
FNDC4	greenyellow	greenyellow
FO681492.1	yellow	black
FOLR1	turquoise	turquoise
FOLR3	yellow	black
FOS	blue	black
FOSB	brown	black
FOXA1	turquoise	turquoise
FOXA2	turquoise	turquoise
FOXA3	grey	grey
FOXD2-AS1	turquoise	turquoise
FOXD3-AS1	turquoise	turquoise
FOXF1	brown	black
FOXF2	magenta	black
FOXI3	grey	grey
FOXM1	turquoise	turquoise
FOXO6	grey	grey
FOXP3	green	green
FPR1	black	black
FPR2	black	black
FRAS1	blue	black
FREM2	blue	black
FREM3	yellow	black
FRGCA	grey	grey
FRMD3	brown	black
FRMD4A	red	black
FRMD4B	blue	black
FRMD5	turquoise	turquoise
FRY	blue	black
FSTL3	brown	black
FTO-IT1	pink	pink
FUT2	yellow	black
FUT3	grey	grey
FUT6	grey	grey
FUT8	grey	grey
FXYD1	blue	black
FXYD3	grey	grey
FXYD6	brown	black
FYB2	pink	pink
FZD4	brown	black
GAB1	blue	black
GAB2	brown	black
GABARAPL1	brown	black
GADD45B	brown	black
GAL	turquoise	turquoise
GALNT13	yellow	black
GALNT14	yellow	black
GALNT18	blue	black
GALNT5	blue	black
GALNT6	turquoise	turquoise
GALNT7	yellow	black
GAPDH	turquoise	turquoise
GAPDHP1	grey	grey
GAREM2	turquoise	turquoise
GAS2L2	pink	pink
GAS6	magenta	black
GATA2	brown	black
GATA6	blue	black
GATA6-AS1	blue	black
GBP4	red	black
GCLC	turquoise	turquoise
GCNT3	brown	black
GCNT4	pink	pink
GDF10	blue	black
GFOD1	brown	black
GFPT1	black	black
GFRA1	blue	black
GFRA3	grey	grey
GGCT	blue	black
GGTA1P	red	black
GGTLC1	turquoise	turquoise
GHR	blue	black
GIMAP1	red	black
GIMAP4	red	black
GIMAP5	red	black
GIMAP6	red	black
GIMAP7	red	black
GIMAP8	red	black
GINS1	turquoise	turquoise
GINS2	turquoise	turquoise
GINS4	turquoise	turquoise
GIPC2	brown	black
GIPC3	brown	black
GJA1	brown	black
GJA4	brown	black
GJA5	brown	black
GJB2	greenyellow	greenyellow
GJB3	grey	grey
GJB6	greenyellow	greenyellow
GJC2	brown	black
GKN2	turquoise	turquoise
GLB1L2	grey	grey
GLB1L3	grey	grey
GLDN	black	black
GLIPR2	black	black
GMDS	yellow	black
GMFG	black	black
GMNN	turquoise	turquoise
GNAQ	blue	black
GNG11	brown	black
GNG4	turquoise	turquoise
GNG7	turquoise	turquoise
GNGT2	black	black
GNL3	turquoise	turquoise
GNPNAT1	turquoise	turquoise
GOLGA7B	grey	grey
GOLM1	yellow	black
GP9	yellow	black
GPA33	yellow	black
GPBAR1	black	black
GPC3	blue	black
GPC5	blue	black
GPD1	yellow	black
GPER1	brown	black
GPI	turquoise	turquoise
GPIHBP1	brown	black
GPM6A	yellow	black
GPM6B	blue	black
GPR146	brown	black
GPR162	pink	pink
GPR17	brown	black
GPR35	grey	grey
GPR37	turquoise	turquoise
GPR4	brown	black
GPR65	red	black
GPR84	green	green
GPR87	greenyellow	greenyellow
GPRC5A	blue	black
GPRIN1	turquoise	turquoise
GPRIN2	yellow	black
GPT2	black	black
GPX2	grey	grey
GPX3	brown	black
GRAMD2A	turquoise	turquoise
GRASP	brown	black
GREM1	greenyellow	greenyellow
GRHL1	grey	grey
GRHL3	grey	grey
GRIA1	yellow	black
GRIK4	brown	black
GRIN2D	turquoise	turquoise
GRK5	brown	black
GRP	grey	grey
GRTP1	red	black
GSAP	turquoise	turquoise
GSDMB	purple	purple
GSDMC	grey	grey
GSTA3	pink	pink
GSTA4	grey	grey
GSTM5	blue	black
GTF2IP13	purple	purple
GTF2IP20	purple	purple
GTSE1	turquoise	turquoise
GUCA2A	yellow	black
GUCY1A2	brown	black
GUCY1B2	grey	grey
GYG2	black	black
GYPC	red	black
GYPE	yellow	black
GZMH	red	black
H1-0	turquoise	turquoise
H1-12P	grey	grey
H1-2	blue	black
H1-4	turquoise	turquoise
H2AC13	blue	black
H2AC17	blue	black
H2AC7	grey	grey
H2AC8	grey	grey
H2AW	grey	grey
H2AX	turquoise	turquoise
H2BC20P	purple	purple
H2BC4	blue	black
H2BC5	blue	black
H2BC8	grey	grey
H2BC9	turquoise	turquoise
H3C10	blue	black
H3C4	turquoise	turquoise
H4C5	grey	grey
H4C8	blue	black
HABP2	grey	grey
HACD1	grey	grey
HACD4	blue	black
HAL	black	black
HAS1	brown	black
HASPIN	turquoise	turquoise
HAVCR1	grey	grey
HBA1	brown	black
HBA2	brown	black
HBB	brown	black
HBEGF	brown	black
HCAR1	grey	grey
HCAR2	grey	grey
HCK	black	black
HCN3	purple	purple
HCST	black	black
HDHD3	blue	black
HECW2	brown	black
HEG1	magenta	black
HELLS	turquoise	turquoise
HES6	blue	black
HEY1	brown	black
HGD	red	black
HGH1	turquoise	turquoise
HHIP	blue	black
HHIP-AS1	blue	black
HHIPL2	grey	grey
HID1-AS1	yellow	black
HIF3A	blue	black
HIGD1B	brown	black
HILPDA	turquoise	turquoise
HJURP	turquoise	turquoise
HK3	black	black
HKDC1	grey	grey
HLA-DOA	red	black
HLA-DPA1	red	black
HLA-DPB1	red	black
HLA-DQA1	red	black
HLA-DQB1	red	black
HLA-DRA	red	black
HLA-DRB1	red	black
HLA-DRB5	red	black
HLA-DRB6	black	black
HLA-E	red	black
HLA-V	brown	black
HLF	turquoise	turquoise
HLX	brown	black
HMBS	turquoise	turquoise
HMGA1	turquoise	turquoise
HMGB3	blue	black
HMGCLL1	blue	black
HMGCS1	grey	grey
HMGCS2	grey	grey
HMGN2P15	yellow	black
HMMR	turquoise	turquoise
HNF4G	brown	black
HNRNPA1P21	green	green
HOPX	turquoise	turquoise
HORMAD1	grey	grey
HOXA10	turquoise	turquoise
HOXA4	brown	black
HOXA5	brown	black
HOXB7	turquoise	turquoise
HOXB9	turquoise	turquoise
HOXC10	grey	grey
HOXC11	grey	grey
HOXC13	grey	grey
HOXC9	grey	grey
HPCAL1	brown	black
HPDL	turquoise	turquoise
HPGD	turquoise	turquoise
HPGDS	black	black
HPS5	red	black
HPSE2	blue	black
HRCT1	brown	black
HROB	turquoise	turquoise
HS6ST2	yellow	black
HSD11B1	red	black
HSD17B13	pink	pink
HSD17B4	blue	black
HSD17B6	turquoise	turquoise
HSF4	purple	purple
HSH2D	yellow	black
HSPA12B	brown	black
HSPB2	magenta	black
HSPB3	blue	black
HSPB6	blue	black
HSPB7	magenta	black
HSPB8	brown	black
HSPD1	turquoise	turquoise
HSPE1	turquoise	turquoise
HTR3A	grey	grey
HTR3C	yellow	black
HYAL1	brown	black
HYAL2	brown	black
HYOU1	turquoise	turquoise
IBSP	greenyellow	greenyellow
ICAM1	black	black
ICAM2	brown	black
ID1	grey	grey
ID2	red	black
ID3	brown	black
ID4	blue	black
IDH2	turquoise	turquoise
IER5L	turquoise	turquoise
IFT57	blue	black
IGF2BP3	turquoise	turquoise
IGFALS	turquoise	turquoise
IGFBP3	greenyellow	greenyellow
IGFBPL1	turquoise	turquoise
IGFL2	greenyellow	greenyellow
IGHA1	green	green
IGHA2	green	green
IGHD	green	green
IGHD2-2	green	green
IGHD3-22	green	green
IGHD3-3	green	green
IGHD3-9	green	green
IGHD6-25	green	green
IGHG1	green	green
IGHG2	green	green
IGHG3	green	green
IGHG4	green	green
IGHGP	green	green
IGHJ1	green	green
IGHJ2	green	green
IGHJ3	green	green
IGHJ3P	green	green
IGHM	green	green
IGHV1-12	green	green
IGHV1-14	green	green
IGHV1-17	green	green
IGHV1-18	green	green
IGHV1-2	green	green
IGHV1-24	green	green
IGHV1-3	green	green
IGHV1-45	green	green
IGHV1-46	green	green
IGHV1-58	green	green
IGHV1-67	green	green
IGHV1-69	green	green
IGHV1-69D	green	green
IGHV1OR15-2	green	green
IGHV1OR15-9	green	green
IGHV1OR21-1	green	green
IGHV2-26	green	green
IGHV2-5	green	green
IGHV2-70	green	green
IGHV2-70D	green	green
IGHV3-11	green	green
IGHV3-13	green	green
IGHV3-15	green	green
IGHV3-19	green	green
IGHV3-20	green	green
IGHV3-21	green	green
IGHV3-23	green	green
IGHV3-30	green	green
IGHV3-33	green	green
IGHV3-35	green	green
IGHV3-41	green	green
IGHV3-43	green	green
IGHV3-47	green	green
IGHV3-48	green	green
IGHV3-49	green	green
IGHV3-52	green	green
IGHV3-53	green	green
IGHV3-60	green	green
IGHV3-62	green	green
IGHV3-63	green	green
IGHV3-64	green	green
IGHV3-66	green	green
IGHV3-7	green	green
IGHV3-71	green	green
IGHV3-72	green	green
IGHV3-73	green	green
IGHV3-74	green	green
IGHV3-76	green	green
IGHV3OR15-7	green	green
IGHV3OR16-13	green	green
IGHV3OR16-8	green	green
IGHV3OR16-9	green	green
IGHV4-28	green	green
IGHV4-31	green	green
IGHV4-34	green	green
IGHV4-39	green	green
IGHV4-4	green	green
IGHV4-55	green	green
IGHV4-59	green	green
IGHV4-61	green	green
IGHV5-51	green	green
IGHV5-78	green	green
IGHV6-1	green	green
IGHV7-81	green	green
IGKC	green	green
IGKJ5	green	green
IGKV1-12	green	green
IGKV1-13	green	green
IGKV1-16	green	green
IGKV1-17	green	green
IGKV1-27	green	green
IGKV1-33	green	green
IGKV1-39	green	green
IGKV1-5	green	green
IGKV1-6	green	green
IGKV1-8	green	green
IGKV1-9	green	green
IGKV1D-12	green	green
IGKV1D-13	green	green
IGKV1D-16	green	green
IGKV1D-17	green	green
IGKV1D-27	green	green
IGKV1D-33	green	green
IGKV1D-39	green	green
IGKV1D-43	green	green
IGKV1D-8	green	green
IGKV1OR2-108	green	green
IGKV1OR2-3	green	green
IGKV1OR2-6	green	green
IGKV1OR22-1	green	green
IGKV1OR22-5	green	green
IGKV2-24	green	green
IGKV2-28	green	green
IGKV2-29	green	green
IGKV2-30	green	green
IGKV2D-24	green	green
IGKV2D-28	green	green
IGKV2D-29	green	green
IGKV2D-40	green	green
IGKV2OR22-4	green	green
IGKV3-11	green	green
IGKV3-15	green	green
IGKV3-20	green	green
IGKV3-7	green	green
IGKV3D-11	green	green
IGKV3D-15	green	green
IGKV3D-20	green	green
IGKV3OR2-268	green	green
IGKV4-1	green	green
IGKV5-2	green	green
IGKV6-21	green	green
IGKV6D-21	green	green
IGLC2	green	green
IGLC3	green	green
IGLC6	green	green
IGLC7	green	green
IGLJ2	green	green
IGLL5	green	green
IGLV1-36	green	green
IGLV1-40	green	green
IGLV1-41	green	green
IGLV1-44	green	green
IGLV1-47	green	green
IGLV1-50	green	green
IGLV1-51	green	green
IGLV10-54	green	green
IGLV2-11	green	green
IGLV2-14	green	green
IGLV2-18	green	green
IGLV2-23	green	green
IGLV2-28	green	green
IGLV2-5	green	green
IGLV2-8	green	green
IGLV3-1	green	green
IGLV3-10	green	green
IGLV3-12	green	green
IGLV3-16	green	green
IGLV3-19	green	green
IGLV3-21	green	green
IGLV3-25	green	green
IGLV3-27	green	green
IGLV3-29	green	green
IGLV3-9	green	green
IGLV4-60	green	green
IGLV4-69	green	green
IGLV5-37	green	green
IGLV5-45	green	green
IGLV6-57	green	green
IGLV7-43	green	green
IGLV7-46	green	green
IGLV8-61	green	green
IGLV9-49	green	green
IGLVI-70	green	green
IGSF10	blue	black
IGSF9	turquoise	turquoise
IHH	yellow	black
IKBKE	yellow	black
IL17D	brown	black
IL18R1	red	black
IL1A	black	black
IL1B	black	black
IL1RL1	brown	black
IL1RL2	yellow	black
IL20RA	pink	pink
IL20RB	turquoise	turquoise
IL23A	turquoise	turquoise
IL2RA	green	green
IL31RA	grey	grey
IL33	blue	black
IL34	blue	black
IL36RN	turquoise	turquoise
IL37	grey	grey
IL3RA	brown	black
IL4I1	green	green
IL5RA	pink	pink
IL6	brown	black
IL7R	red	black
ILF2	turquoise	turquoise
IMPA1P1	yellow	black
INAVA	yellow	black
INCENP	turquoise	turquoise
INHA	red	black
INKA1	brown	black
INKA2	brown	black
INMT	blue	black
INPP5K	brown	black
INSIG1	yellow	black
INSYN1	turquoise	turquoise
INTS8	turquoise	turquoise
IQANK1	blue	black
IQCA1	pink	pink
IQCN	yellow	black
IQGAP3	turquoise	turquoise
IQSEC3	brown	black
IRAK1	turquoise	turquoise
IRAK3	red	black
IRF7	grey	grey
IRF8	red	black
IRX1	turquoise	turquoise
IRX2	turquoise	turquoise
ITGA11	greenyellow	greenyellow
ITGA8	blue	black
ITGAL	red	black
ITGAM	red	black
ITGB4	grey	grey
ITIH5	blue	black
ITLN1	yellow	black
ITLN2	yellow	black
ITM2A	brown	black
ITM2C	green	green
ITPKA	yellow	black
ITPRID2	brown	black
ITPRIP	brown	black
IVL	grey	grey
JAM2	brown	black
JAM3	magenta	black
JAML	red	black
JCAD	brown	black
JDP2	brown	black
JPH1	blue	black
JPH2	magenta	black
JPH4	brown	black
JPT1	turquoise	turquoise
JPT2	turquoise	turquoise
JSRP1	green	green
JUN	brown	black
JUNB	brown	black
JUND	brown	black
KANK2	magenta	black
KANK3	brown	black
KANK4	brown	black
KAT2A	purple	purple
KAT2B	red	black
KAZN	blue	black
KCNA3	red	black
KCNA4	yellow	black
KCNA5	blue	black
KCNAB1	blue	black
KCNAB2	red	black
KCNE4	grey	grey
KCNJ15	turquoise	turquoise
KCNJ5	red	black
KCNJ8	brown	black
KCNK1	grey	grey
KCNK17	brown	black
KCNK3	brown	black
KCNK5	grey	grey
KCNMB2-AS1	turquoise	turquoise
KCNN4	yellow	black
KCNQ1	turquoise	turquoise
KCNQ3	grey	grey
KCNT2	yellow	black
KCTD12	red	black
KDELR3	yellow	black
KDR	brown	black
KHDC4	purple	purple
KHDRBS2	blue	black
KIAA0040	brown	black
KIAA1324L	blue	black
KIF11	turquoise	turquoise
KIF14	turquoise	turquoise
KIF15	turquoise	turquoise
KIF17	brown	black
KIF18B	turquoise	turquoise
KIF1A	turquoise	turquoise
KIF1C	brown	black
KIF20A	turquoise	turquoise
KIF22	turquoise	turquoise
KIF23	turquoise	turquoise
KIF26A	brown	black
KIF26B	greenyellow	greenyellow
KIF2C	turquoise	turquoise
KIF4A	turquoise	turquoise
KIFC1	turquoise	turquoise
KIFC2	purple	purple
KISS1R	blue	black
KL	brown	black
KLB	yellow	black
KLF10	brown	black
KLF13	brown	black
KLF15	turquoise	turquoise
KLF2	brown	black
KLF4	brown	black
KLF6	brown	black
KLF9	brown	black
KLHL17	purple	purple
KLK10	grey	grey
KLK11	grey	grey
KLK12	grey	grey
KLK6	grey	grey
KLRF1	yellow	black
KLRG2	yellow	black
KMO	black	black
KNDC1	pink	pink
KNL1	turquoise	turquoise
KNTC1	turquoise	turquoise
KPNA2	turquoise	turquoise
KPNA7	grey	grey
KRT15	grey	grey
KRT16	greenyellow	greenyellow
KRT16P2	grey	grey
KRT17	grey	grey
KRT18	blue	black
KRT4	yellow	black
KRT6A	grey	grey
KRT79	black	black
KRT8	blue	black
KRT80	turquoise	turquoise
KRT81	grey	grey
KRTAP4-1	grey	grey
KRTCAP3	red	black
LAD1	yellow	black
LAGE3	turquoise	turquoise
LAIR1	black	black
LAMA3	brown	black
LAMA4	magenta	black
LAMB2	brown	black
LAMC3	brown	black
LAMP3	turquoise	turquoise
LAMP5	greenyellow	greenyellow
LANCL1-AS1	yellow	black
LAPTM4B	yellow	black
LAPTM5	black	black
LARGE2	red	black
LATS2	brown	black
LBH	magenta	black
LCN2	grey	grey
LCP1	red	black
LDB2	brown	black
LDHA	turquoise	turquoise
LDLR	brown	black
LDLRAD1	pink	pink
LEFTY2	blue	black
LEMD1	grey	grey
LEPR	blue	black
LGALSL	yellow	black
LGI2	greenyellow	greenyellow
LGI3	yellow	black
LGI4	brown	black
LGR4	yellow	black
LGSN	black	black
LHFPL3	turquoise	turquoise
LHFPL3-AS2	turquoise	turquoise
LHFPL6	blue	black
LIFR	blue	black
LILRA1	red	black
LILRA2	black	black
LILRA5	black	black
LILRA6	black	black
LILRB3	black	black
LIMCH1	blue	black
LIMD1	turquoise	turquoise
LIMK1	turquoise	turquoise
LIMS2	brown	black
LIN7A	brown	black
LINC00092	blue	black
LINC00163	yellow	black
LINC00261	turquoise	turquoise
LINC00460	grey	grey
LINC00472	blue	black
LINC00511	turquoise	turquoise
LINC00551	brown	black
LINC00665	turquoise	turquoise
LINC00676	grey	grey
LINC00702	blue	black
LINC00857	turquoise	turquoise
LINC00942	turquoise	turquoise
LINC00968	yellow	black
LINC00987	brown	black
LINC01082	yellow	black
LINC01150	black	black
LINC01169	yellow	black
LINC01270	blue	black
LINC01290	yellow	black
LINC01352	blue	black
LINC01426	yellow	black
LINC01436	grey	grey
LINC01506	black	black
LINC01513	pink	pink
LINC01552	pink	pink
LINC01564	turquoise	turquoise
LINC01607	red	black
LINC01612	turquoise	turquoise
LINC01614	greenyellow	greenyellow
LINC01645	blue	black
LINC01671	turquoise	turquoise
LINC01703	brown	black
LINC01765	pink	pink
LINC01836	turquoise	turquoise
LINC01863	yellow	black
LINC01914	red	black
LINC01936	blue	black
LINC01963	brown	black
LINC01977	purple	purple
LINC01983	grey	grey
LINC01996	yellow	black
LINC02014	brown	black
LINC02016	yellow	black
LINC02038	turquoise	turquoise
LINC02104	brown	black
LINC02154	yellow	black
LINC02159	grey	grey
LINC02185	blue	black
LINC02257	grey	grey
LINC02345	pink	pink
LINC02362	green	green
LINC02416	grey	grey
LINC02471	turquoise	turquoise
LINC02474	grey	grey
LINC02489	turquoise	turquoise
LINC02544	greenyellow	greenyellow
LINC02555	turquoise	turquoise
LINC02560	grey	grey
LINC02562	grey	grey
LINC02570	yellow	black
LINC02657	turquoise	turquoise
LINC02678	turquoise	turquoise
LINC02772	turquoise	turquoise
LINC02785	black	black
LINC02864	grey	grey
LINGO1	grey	grey
LINP1	grey	grey
LIPA	black	black
LIPM	grey	grey
LIPN	yellow	black
LMCD1	magenta	black
LMNB1	turquoise	turquoise
LMO2	brown	black
LMO7	blue	black
LMOD1	magenta	black
LNX2	turquoise	turquoise
LOXL2	greenyellow	greenyellow
LPL	brown	black
LPXN	red	black
LRCH2	blue	black
LRP1	magenta	black
LRP2	grey	grey
LRP2BP	turquoise	turquoise
LRRC10B	pink	pink
LRRC15	greenyellow	greenyellow
LRRC18	pink	pink
LRRC2	yellow	black
LRRC20	grey	grey
LRRC25	black	black
LRRC32	brown	black
LRRC36	yellow	black
LRRC4	pink	pink
LRRC46	pink	pink
LRRC4B	brown	black
LRRC71	pink	pink
LRRC8C	red	black
LRRK2	turquoise	turquoise
LRRK2-DT	turquoise	turquoise
LRRN3	yellow	black
LRRN4	blue	black
LSAMP	magenta	black
LSR	yellow	black
LST1	black	black
LTBP4	brown	black
LUCAT1	turquoise	turquoise
LY6D	grey	grey
LY6K	turquoise	turquoise
LY86	black	black
LYPD1	yellow	black
LYPD2	pink	pink
LYPD3	turquoise	turquoise
LYVE1	brown	black
LYZ	red	black
MAATS1	pink	pink
MAB21L4	blue	black
MACROD2	turquoise	turquoise
MAD2L1	turquoise	turquoise
MAFF	brown	black
MAGEA3	turquoise	turquoise
MAGEA6	turquoise	turquoise
MAGI1	blue	black
MAGI2-AS3	magenta	black
MAGI3	blue	black
MAL	blue	black
MAMDC2	blue	black
MANEAL	grey	grey
MANF	turquoise	turquoise
MAOA	turquoise	turquoise
MAOB	blue	black
MAP1LC3C	black	black
MAP3K3	blue	black
MAP3K8	brown	black
MAP6	pink	pink
MAP7D2	grey	grey
MAPK10	turquoise	turquoise
MAPK4	yellow	black
MARCKSL1	turquoise	turquoise
MARCO	black	black
MARVELD3	brown	black
[truncated: 1,305 more rows]
